# Supplementary material for: Care of the Geriatric Colorectal Surgical Patient and Framework for Creating a Geriatric Program: A Compendium From the 2019 American Society of Colon and Rectal Surgeons Annual Meeting
Source: PubMed Central journal article supplement — Dis Colon Rectum. 2020 Sep 14;63(11):1489–95. doi: 10.1097/DCR.0000000000001793 (PMC7547896; doi:10.1097/dcr.0000000000001793), 2020-09-14
Supplement: dcr-63-1489-s001.pdf [file dcr-63-1489-s001.pdf]

**Supplementary Table 1: Summary of Commonly Used Frailty Screening Tests**

| Test                                                                          | Acronym  | Range of Possible Scores | Frailty Indicator Threshold | Purpose                                                                                              |
|-------------------------------------------------------------------------------|----------|--------------------------|-----------------------------|------------------------------------------------------------------------------------------------------|
| <b>Eastern Collaborative Oncology Group Performance Status</b> <sup>1,2</sup> | ECOG PS  | 0–4                      | ≥1                          | Evaluation of cancer burden on functional status                                                     |
| <b>Katz Activities of Daily Living</b> <sup>3</sup>                           | ADL      | 0–6                      | <5                          | Evaluation of functional independence                                                                |
| <b>Mini-Cog</b> <sup>4,5</sup>                                                | Mini-Cog | 0–5                      | ≤2                          | Detection of cognitive impairment in older adults therefore suitable for a more thorough evaluation. |
| <b>Flemish version of the Triage Risk Screening Test</b> <sup>6,7</sup>       | fTRST    | 0–6                      | ≥2                          | Detection of hospitalized geriatric patients at risk for frailty                                     |
| <b>Timed Up &amp; Go Test</b> <sup>8,9</sup>                                  | TUG      | Not Applicable           | ≥20 s                       | 10 feet (3 meters) walking test to determine gait speed                                              |
| <b>G8</b> <sup>10</sup>                                                       | G8       | 0–17                     | ≤14                         | Detection of onco-geriatric patients who may benefit from comprehensive geriatric assessment         |

|                                                              |      |                                                |                                 |                                                                                              |
|--------------------------------------------------------------|------|------------------------------------------------|---------------------------------|----------------------------------------------------------------------------------------------|
| <b>Nutritional Risk Screening<sup>11</sup></b>               | NRS  | Normal to severely impaired nutritional status | Moderately to severely impaired | Evaluation of nutritional status taking into account BMI, weight loss and food intake        |
| <b>American Society of Anesthesiology score<sup>12</sup></b> | ASA  | 1–5                                            | Not applicable                  | Evaluation of preoperative general clinical condition and estimation of anesthesiologic risk |
| <b>Charlson Age Comorbidity Index<sup>13,14</sup></b>        | CACI | 0–42                                           | ≥6                              | Evaluation of cumulative burden of patient's comorbidities                                   |

### References for Supplementary Table 1

1. Oken MM, Creech RH, Tormey DC, et al. Toxicity and response criteria of the Eastern Cooperative Oncology Group. *Am J Clin Oncol.* 1982;5:649–655.
2. Ethun CG, Bilen MA, Jani AB, Maithel SK, Ogan K, Master VA. Frailty and cancer: implications for oncology surgery, medical oncology, and radiation oncology. *CA Cancer J Clin.* 2017;67:362–377.
3. Katz S, Akpom CA. A measure of primary sociobiological functions. *Int J Health Serv.* 1976;6:493–508.
4. Ketelaars L, Pottel L, Lycke M, et al. Use of the Freund clock drawing test within the Mini-Cog as a screening tool for cognitive impairment in elderly patients with or without cancer. *J Geriatr Oncol.* 2013;4:174–182.
5. Robinson TN, Wu DS, Pointer LF, Dunn CL, Moss M. Preoperative cognitive dysfunction is related to adverse postoperative outcomes in the elderly. *J Am Coll Surg.* 2012;215:12–17.
6. Deschodt M, Wellens NI, Braes T, et al. Prediction of functional decline in older hospitalized patients: a comparative multicenter study of three screening tools. *Aging Clin Exp Res.* 2011;23:421–426.

7. Zattoni D, Montroni I, Saur NM, et al. A simple screening tool to predict outcomes in older adults undergoing emergency general surgery. *J Am Geriatr Soc.* 2019;67:309–316.
8. Huisman MG, van Leeuwen BL, Ugolini G, et al. “Timed Up & Go”: a screening tool for predicting 30-day morbidity in onco-geriatric surgical patients? A multicenter cohort study. *PLoS One.* 2014;9:e86863.
9. Podsiadlo D, Richardson S. The timed “Up & Go”: a test of basic functional mobility for frail elderly persons. *J Am Geriatr Soc.* 1991;39:142–148.
10. Bellera CA, Rainfray M, Mathoulin-Pélissier S, et al. Screening older cancer patients: first evaluation of the G-8 geriatric screening tool. *Ann Oncol.* 2012;23:2166–2172.
11. Kondrup J, Rasmussen HH, Hamberg O, Stanga Z; Ad Hoc ESPEN Working Group. Nutritional risk screening (NRS 2002): a new method based on an analysis of controlled clinical trials. *Clin Nutr.* 2003;22:321–336.
12. Owens WD, Felts JA, Spitznagel EL Jr. ASA physical status classifications: a study of consistency of ratings. *Anesthesiology.* 1978;49:239–243.
13. Chang CM, Yin WY, Wei CK, et al. Adjusted age-adjusted Charlson comorbidity index score as a risk measure of perioperative mortality before cancer surgery. *PLoS One.* 2016;11:e0148076.
14. Tian Y, Jian Z, Xu B, Liu H. Age-adjusted Charlson comorbidity index score as predictor of survival of patients with digestive system cancer who have undergone surgical resection. *Oncotarget.* 2017;8:79453–79461.
