# Supplementary material for: Care of the Geriatric Colorectal Surgical Patient and Framework for Creating a Geriatric Program: A Compendium From the 2019 American Society of Colon and Rectal Surgeons Annual Meeting
Source: PubMed Central journal article supplement — Dis Colon Rectum. 2020 Sep 14;63(11):1489–95. doi: 10.1097/DCR.0000000000001793 (PMC7547896; doi:10.1097/dcr.0000000000001793), 2020-09-14

# Supplementary Figure 1: A Proposed Algorithm to Screen for Frailty in the Surgical Office Setting

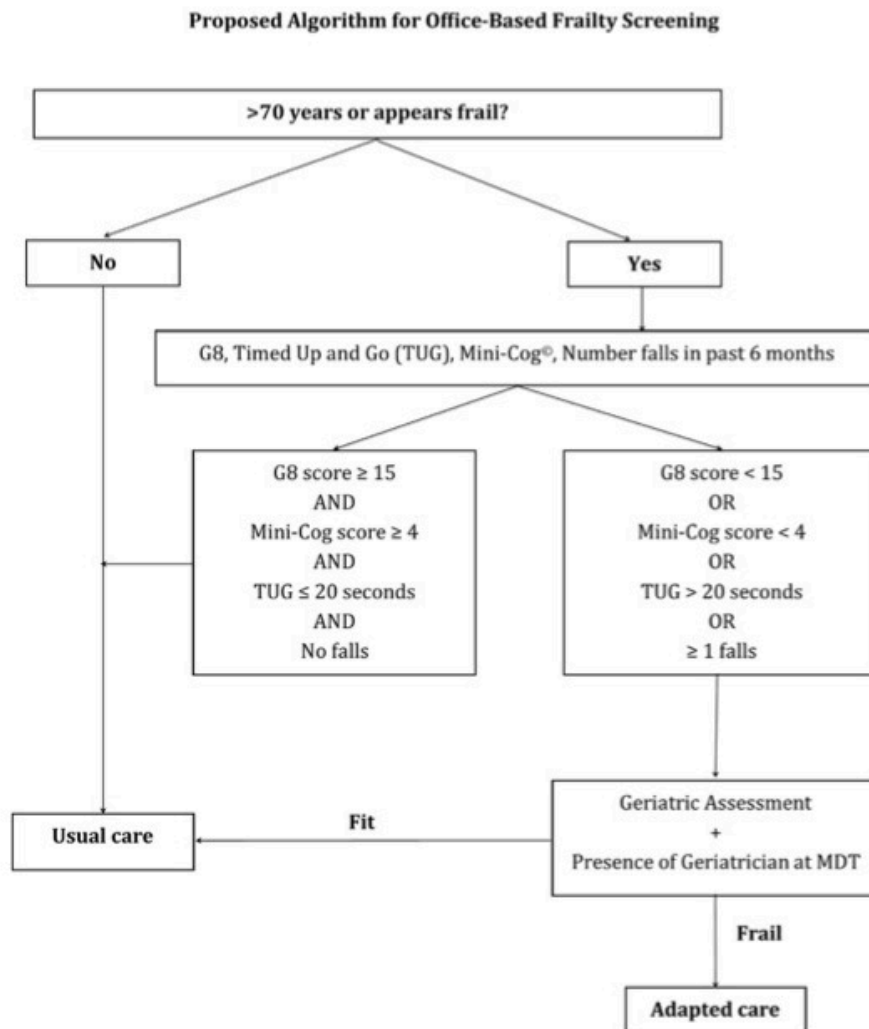

Supplement: dcr-63-1489-s002.pdf [file dcr-63-1489-s002.pdf]
